## CORRESPONDENCE

Anesthesiology  
83:223, 1995  
© 1995 American Society of Anesthesiologists, Inc.  
Lippincott-Raven Publishers

## The Precipitation of Rocuronium in a Needleless Intravenous Injection Adaptor

*To the Editor:*—The mixture of sodium thiopental and rocuronium bromide (Zemuron) results in the immediate formation of a white precipitate. This can be avoided during anesthetic induction by adequately flushing the intravenous line after the injection of sodium thiopental, before the injection of rocuronium bromide. This conventional wisdom holds true for standard needle intravenous infusion systems but is confounded by newer adaptations that render the infusion system needleless.

I have observed on several occasions the formation of such a precipitate after sequential intravenous injection of sodium thiopental/rocuronium bromide through a needleless Y-injection site adaptor (Access pin with Safesite Valve by B. Braun Medical Inc.). It is apparent that a small aliquot of the initial injected drug, sodium thiopental, remains trapped in the void space of the needleless system adaptor. This small volume is not affected by subsequent flushing of the intravenous line, because the infusate never reaches the void

space. The injection of rocuronium bromide with its associated turbulence leads to the mixing of the two drugs within the needleless adaptor and causes the formation of the precipitate.

This reaction has resulted in the complete occlusion of two intravenous lines during anesthetic induction. Obviously, this is an inopportune time to be pressed to start a new intravenous infusion. With regard to the new needleless systems—let the buyer beware.

**L. Molbegott, M.D.**  
Department of Anesthesiology  
Monmouth Medical Center  
Long Branch, New Jersey 07740-6395

(Accepted for publication May 31, 1995.)

Anesthesiology  
83:223-224, 1995  
© 1995 American Society of Anesthesiologists, Inc.  
Lippincott-Raven Publishers

## Thoracic Sympathetic Blockade Does Not Imply Vagal Dominance

*To the Editor:*—We would like to congratulate Kamibayashi *et al.* on their interesting paper.<sup>1</sup> However, we wish to offer an alternative view to one of their conclusions. The authors stated, "Sympathetic activity to the heart in epidurally anesthetized animals was significantly attenuated, while parasympathetic activity was not affected. Therefore, the activity in the parasympathetic nerve may be relatively dominant to sympathetic tone after epidural treatment, and this situation is similar to vagal nerve stimulation." Although it is intuitive to suggest that, when the sympathetic efferent nerves are blocked, a relative vagal dominance would exist, clinically this is not the case. Rather, in patients with a cardiac sympathectomy after high spinal block (T4-C7),<sup>2,3</sup> spectral analysis of heart rate variability results in a loss of both sympathetic and vagal outflow<sup>4</sup> and probably results in a state of reduced sympathetic and vagal outflow<sup>4</sup> and probably results in a state of reduced sympathetic and vagal outflow.<sup>5</sup> Therefore, from sympathetic afferent blockade to central neural centers.<sup>5</sup> Therefore, the vagal outflow, which was not directly blocked by the anesthetic, was not sufficient to maintain normal heart rate variability.<sup>6</sup> In their dog model of thoracic sympathectomy,<sup>1</sup> the baroreceptor pressor response after epinephrine probably created a vagal dominant state, but we submit that this state would not exist in the absence of systemic hypertension. Therefore, we believe that sympathectomy

of the heart alone does not necessarily result in a state of vagal dominance but that vagal dominance exists only after sympathetic blockade in the presence of vagal stimulation.

**R. P. S. Introna, M.D.**  
**J. K. Pruett, Ph.D.**  
**D. C. Martin, M.D.**  
**E. H. Yodlowski, Ph.D.**  
**E. Grover**  
**R. S. Crumrine, M.D.**  
Department of Anesthesiology  
Medical College of Georgia  
Augusta, Georgia 30912

### References

1. Kamibayashi T, Hayashi Y, Mammoto T, Yamatodani A, Taenaka N, Yoshiya I: Thoracic epidural anesthesia attenuates halothane-induced myocardial sensitization to dysrhythmogenic effect of epinephrine in dogs. *ANESTHESIOLOGY* 82:129-134, 1995

## CORRESPONDENCE

2. Pruett JK, Yodlowski EH, Introna RPS, Buggay DS, Crumrine RS: The influence of spinal anesthetics on heart rate variations. *Pharmacology (Life Sci Adv)* 10:51-55, 1991
3. Introna R, Yodlowski E, Pruett J, Montano N, Porta A, Crumrine R: Sympathovagal effects of spinal anesthesia assessed by heart rate variability analysis. *Anesth Analg* 80:315-321, 1995
4. Malliani A, Pagani M, Lombardi F, Cerutti S: Cardiovascular neural regulation in the frequency domain. *Circulation* 84:482-492, 1991

Anesthesiology  
83:224, 1995  
© 1995 American Society of Anesthesiologists, Inc.  
Lippincott-Raven Publishers

*In Reply:*—We appreciate the useful suggestion to our study expressed by Introna *et al.* Based on their study using spectral analysis of heart rate variability, which showed that both sympathetic and parasympathetic activity reduced after cardiac sympathectomy with spinal block,<sup>1</sup> we agree that vagal dominance after epidural anesthesia might not exist, although we did not evaluate sympathovagal balance after thoracic epidural blockade.<sup>2</sup> In our dysrhythmogenic experiments,<sup>2</sup> bilateral vagotomy did not affect the dysrhythmogenic threshold significantly in dogs without thoracic epidural blockade, suggesting that vagal stimulation alone induced by baroreceptor pressor response after epinephrine infusion was not enough to affect halothane-epinephrine dysrhythmias. However, vagal stimulation played a significant role in preventing the dysrhythmias in dogs with thoracic sympathetic blockade, although vagal outflow may have been reduced through the central nervous system.<sup>3</sup> These observations suggested that sympathetic activity as well as sympathovagal balance might be important in the myocardial sensitization by halothane.

**Takahiko Kamibayashi, M.D.**  
Staff Anesthesiologist  
Department of Anesthesiology  
Osaka University Medical School  
2-2 Yamada-oka, Suita City  
Osaka 565, Japan

Anesthesiology  
83:224-225, 1995  
© 1995 American Society of Anesthesiologists, Inc.  
Lippincott-Raven Publishers

## Parkinsonian Signs May Be Related to Bupivacaine Excess

*To the Editor:*—Muravchick and Smith described Parkinsonian signs in a patient after general anesthesia.<sup>1</sup> Of interest, bupivacaine was used, both for intercostal blockade as well as for wound infiltration in a total dose of 225 mg (45 ml of 0.5%). This is the maximum dose that can be used.<sup>2</sup> Indeed, Wood<sup>3</sup> considers 2 mg/kg the highest

5. Introna RPS, Montano N, Yodlowski EH, Crumrine RS, Malliani A, Pruett JK: Cardiothoracic sympathetic afferent activity is necessary to maintain heart rate variability (HRV) in humans. *FASEB J* 9:A341, 1995
6. Malliani A, Lombardi F, Pagani M, Cerutti S: Power spectral analysis of cardiovascular variability in patients at risk for sudden cardiac death. *J Cardiovasc Electrophysiol* 5:274-286, 1994

(Accepted for publication April 4, 1995.)

**Yukio Hayashi, M.D.**  
Staff Anesthesiologist  
Department of Anesthesiology  
National Cardiovascular Center  
1-5-7 Fujishiro-dai, Suita City  
Osaka 565, Japan

## References

1. Introna R, Yodlowski E, Pruett J, Montano N, Porta A, Crumrine R: Sympathovagal effects of spinal anesthesia assessed by heart rate variability analysis. *Anesth Analg* 80:315-321, 1995
2. Kamibayashi T, Hayashi Y, Mammoto T, Yamatodani A, Taenaka N, Yoshiya I: Thoracic epidural anesthesia attenuates halothane-induced myocardial sensitization to dysrhythmogenic effect of epinephrine in dogs. *ANESTHESIOLOGY* 82:129-134, 1995
3. Malliani A, Pagani M, Lombardi F, Cerutti S: Cardiovascular neural regulation in the frequency domain. *Circulation* 84:482-492, 1991

(Accepted for publication April 4, 1995.)

safe limit, which, in the reported case (80 kg), would have been 160 mg bupivacaine. The rate of injection and rapidity with which blood concentrations of bupivacaine are achieved can alter its toxicity signs. The use of epinephrine could have delayed the absorption of bupivacaine so that a toxic concentration would have been reached

## CORRESPONDENCE

only at the end of the procedure. Further conclusion of the case (due to incomplete reduction of the central nervous system toxicity of bupivacaine).<sup>2</sup> The signs noticed in this case and prolonged emergence from anesthesia related to a high blood concentration of bupivacaine indicate that the blood bupivacaine concentration

**M. A. Y. Elias, F.R.C.P.**  
Pain Medicine and  
The University Centre  
Rehabilitation at  
6410 Fanning Suite  
Houston, Texas 77057

Anesthesiology  
83:225, 1995  
© 1995 American Society of Anesthesiologists, Inc.  
Lippincott-Raven Publishers

*In Reply:*—Elias implies that the unusual signs from anesthesia we described are a case of a manifestation of central nervous system toxicity. Relevant facts do not support this hypothesis. First, the blood bupivacaine did not exceed the recommended level that is understandable by the manifestations of local anesthetic toxicity. Second, after intercostal nerve block, my own extensive clinical experience and the literature<sup>1,2</sup> support the practice<sup>3,4</sup>; and (3) the event was not influenced significantly by the patient's ventilation because continuous monitoring of end-tidal carbon dioxide throughout the procedure confirmed there was no evidence of hypoxia or hypercarbia presumed to exist by Elias.

**Stanley Muravchick, M.D.**  
Professor of Anesthesiology  
Department of Anesthesiology  
University of Texas Medical Branch

Anesthesiology  
83:225-226, 1995  
© 1995 American Society of Anesthesiologists, Inc.  
Lippincott-Raven Publishers

## Unanticipated

*To the Editor:*—A 47-yr-old woman with a history of experienced difficult intubations with multiple attempts undergoing general endotracheal anesthesia
